# Supplementary material
Source: ML conference proceedings conference paper supplement (https://proceedings.mlr.press/v139/kidger21a.html)
Supplement: Supplementary file 1 [file kidger21a-supp.zip]

## A. Code

**Built-in to torchdiffeq** `torchdiffeq` (Chen et al., 2018) has chosen to support adjoint seminorms as a built-in option. This may be used by passing `odeint_adjoint(..., adjoint_options=dict(norm='seminorm'))`.

**PyTorch reference implementation** A reference implementation, using PyTorch (Paszke et al., 2019) and `torchdiffeq` (Chen et al., 2018), is shown in Figure 7.

By default, `torchdiffeq` uses a (somewhat unusual) mixed  $L^\infty$ -RMS norm. Given the adjoint state  $[a_t, z, a_z, a_\theta]$ , then the norm used is

$$\|[a_t, z, a_z, a_\theta]\| = \max\{\|a_t\|_{\text{RMS}}, \|z\|_{\text{RMS}}, \|a_z\|_{\text{RMS}}, \|a_\theta\|_{\text{RMS}}\},$$

where for  $x = (x_1, \dots, x_n)$ ,

$$\|x\|_{\text{RMS}} = \sqrt{\frac{1}{n} \sum_{i=1}^n x_i^2}.$$

Respecting this convention, the code provided reduces this to the seminorm

$$\|[a_t, z, a_z, a_\theta]\| = \max\{\|z\|_{\text{RMS}}, \|a_z\|_{\text{RMS}}\}.$$

Other similar approaches such as pure-RMS over  $[z, a_z]$  should be admissible as well.

**Julia** The `DifferentialEquation.jl` library (Rackauckas & Nie, 2017) library offers an argument `internallnorm` which may be used to implement seminorms in a manner analogous to the reference implementation provided here.

## B. Experimental details

### B.1. Neural Controlled Differential Equations

We use the same setup and hyperparameters as in Kidger et al. (2020). The loss function is cross entropy. The optimiser used was Adam (Kingma & Ba, 2015), with learning rate  $1.6 \times 10^{-3}$ , batch size of 1024, and 0.01-weighted  $L^2$  weight regularisation, trained for 200 epochs. The number of hidden channels (the size of  $z$ ) is 90, and  $f$  is parameterised as a feedforward network, of width 40 with 4 hidden layers, ReLU activation, and tanh final activation.

### B.2. Continuous Normalising Flows

We follow Grathwohl et al. (2019) and Finlay et al. (2020). The loss function is the negative log likelihood  $-\log(p(z(T) = x))$  of equation (6). The optimiser used was Adam, with learning rate  $10^{-3}$  and batch size 256, trained for 100 epochs. Relative and absolute tolerance of the solver are both taken to be  $10^{-5}$ . We used a multi-scale architecture as in Grathwohl et al. (2019) and Finlay et al. (2020), with 4 blocks of CNFs at 3 different scales.

### B.3. Symplectic ODE-Net

The optimiser used was Adam, with learning rate  $10^{-3}$ , batch size of 256, and 0.01-weighted  $L^2$  weight regularisation. Relative and absolute tolerance of the solver are both taken to be  $10^{-4}$ . We use the same architecture as in Zhong et al. (2020): this involves parameterising  $H$  as a sum of kinetic and potential energy terms. These details of Symplectic ODE-Net are a little involved, and we refer the reader to Zhong et al. (2020) for full details.

```
1 import torchdiffeq
2
3 def rms_norm(tensor):
4     return tensor.pow(2).mean().sqrt()
5
6 def make_norm(state):
7     state_size = state.numel()
8
9     def norm(aug_state):
10         y = aug_state[1:1 + state_size]
11         adj_y = aug_state[1 + state_size:1 + 2 * state_size]
12         return max(rms_norm(y), rms_norm(adj_y))
13     return norm
14
15 torchdiffeq.odeint_adjoint(func=..., y0=..., t=...,
16                             adjoint_options=dict(norm=make_norm(y0)))
```

Figure 7: Reference PyTorch implementation for adjoint seminorms.
